# Supplementary material for: Sequence Characteristics and Phylogenetic Analysis of the Artemisia argyi Chloroplast Genome
Source: PubMed Central journal article supplement (PMC9252292; doi:10.3389/fpls.2022.906725), 2022-06-20
Supplement: Data_Sheet_1.pdf [file Data_Sheet_1.pdf]

# Supplementary Material

## Figure. S1

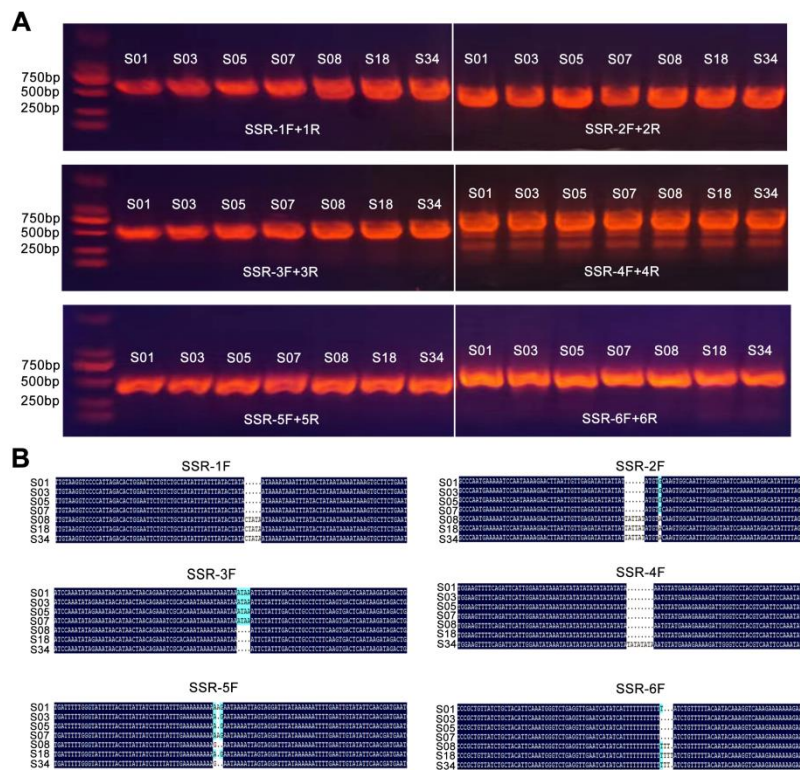

**Fig. S1 Identification of seven *Artemisia argyi* varieties (S01, S03, S05, S07, S08, S18 and S34) based on SSRs.**

(A) The primers used for the identification of these seven *Artemisia argyi* varieties are listed in Table S2. The corresponding PCR products are amplified using the genomic DNA of S01, S03, S05, S07, S08, and S71, respectively. (B) The results of Sanger sequencing, which are consistent with the SSR analysis based on *Artemisia argyi* cp genomes.



**Figure. S3**

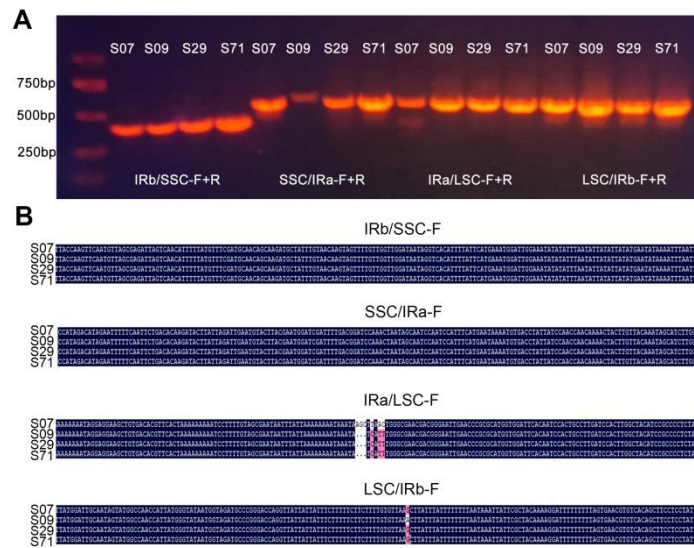

**Fig. S3 The validation of IR/SC boundaries in *Artemisia argyi* cp genomes.**

(A) Four pairs of primers (IRb/SSC-F+R, SSC/IRa-F+R, IRa/LSC-F+R, and LSC/IRb-F+R) are used to validate IR/SC boundaries. The corresponding PCR products are amplified using the genomic DNA of S07, S09, S29, and S71, respectively. (B) Sanger sequencing of PCR products. The results are consistent with corresponding assembled *Artemisia argyi* cp genomes from high throughput sequencing.

Figure. S4

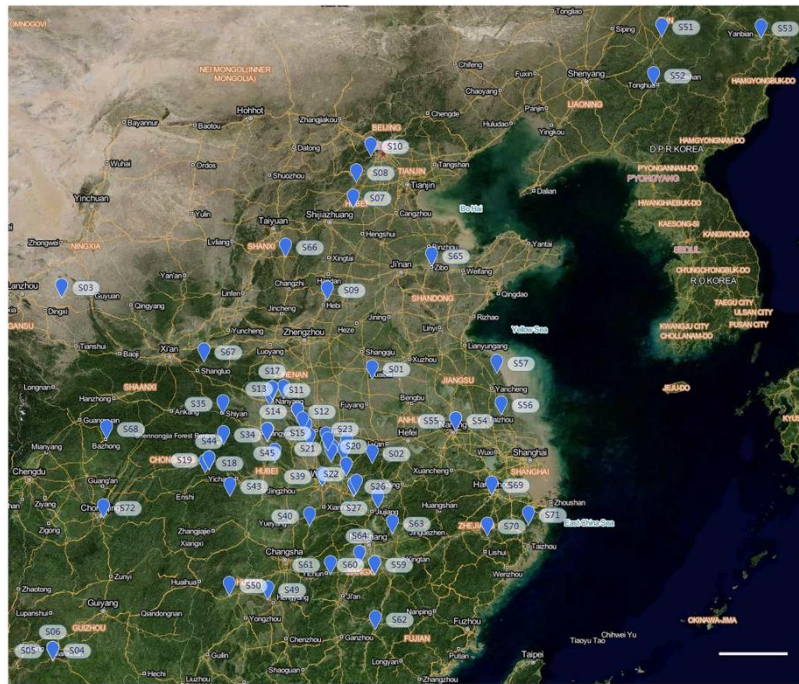

Fig. S4 The distribution of *Artemisia argyi* varieties.

Scale bar = 20 km.

**Figure. S5**

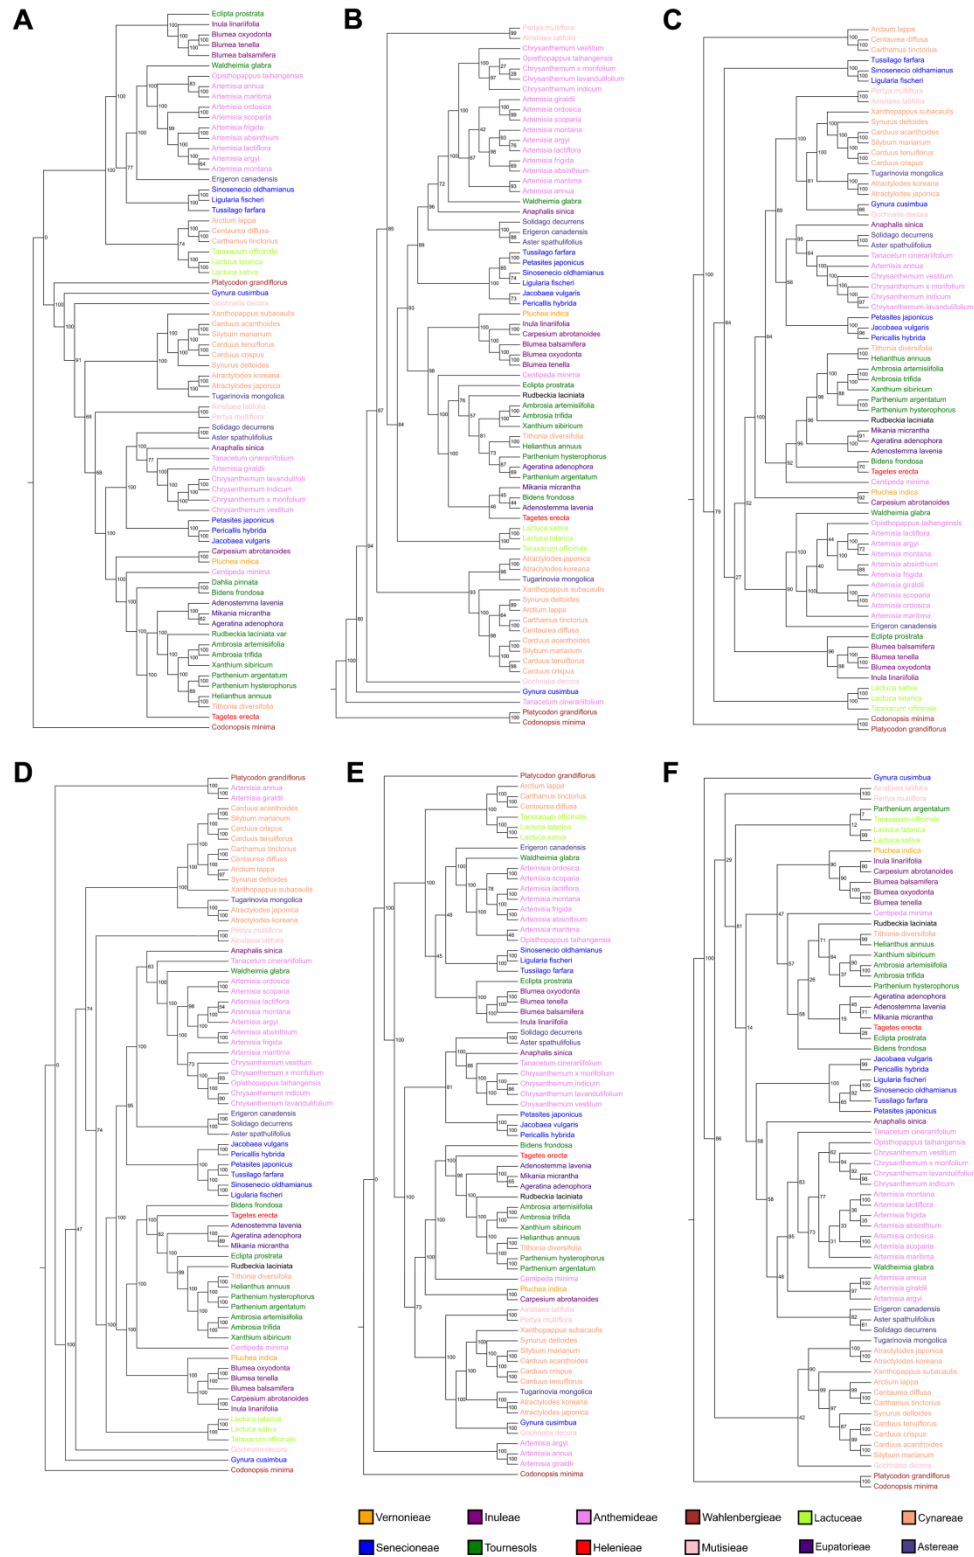

**Fig.S5 Phylogenetic trees of 67 *Asteraceae* species based on their cp genomes by**

**ML.**

(A) Phylogenetic tree based on the full-length cp genomes; (B) Phylogenetic tree based on IR regions; (C) Phylogenetic tree based on SSC regions; (D) Phylogenetic tree based on LSC regions; (E) Phylogenetic tree based on CDSs; (F) Phylogenetic tree based on introns.

**Table S1 Description of *Artemisia argyi* accessions in this study.**

|                        | Collecting locality | Longitude<br>(°E) | Latitude<br>(°N) | Altitude<br>(m) | Type       | Sample<br>number | Full length of<br>cp genome<br>(bp) |
|------------------------|---------------------|-------------------|------------------|-----------------|------------|------------------|-------------------------------------|
| Anhui                  | Qiaocheng, Bozhou   | 115.99            | 33.62            | 37              | Wild       | S01              | 151177                              |
|                        | Huoshan, Lu'an      | 115.99            | 31.13            | 719             | Wild       | S02              | 151180                              |
| Gansu                  | Xihe, Longnan       | 105.20            | 35.95            | 1553            | Wild       | S03              | 151177                              |
| Guizhou                | Pengzha, Xingyi     | 104.90            | 25.08            | 1193            | Cultivated | S04              | 151178                              |
|                        | Pengzha, Xingyi     | 104.90            | 25.08            | 1193            | Cultivated | S05              | 151176                              |
|                        | Pengzha, Xingyi     | 104.90            | 25.08            | 1193            | Cultivated | S06              | 151177                              |
| Hebei                  | Anguo, Baoding      | 115.33            | 38.42            | 30              | Wild       | S07              | 151202                              |
|                        | Xushui, Baoding     | 115.46            | 39.12            | 24              | Wild       | S08              | 151148                              |
| Henan                  | Tangyin, Anyang     | 114.44            | 35.87            | 73              | Wild       | S09              | 151178                              |
|                        | Fangcheng, Nanyang  | 115.95            | 39.83            | 153             | Wild       | S10              | 151152                              |
|                        | Sheqi, Nanyang      | 112.52            | 33.00            | 121             | Cultivated | S11              | 151151                              |
|                        | Sheqi, Nanyang      | 113.40            | 32.37            | 125             | Wild       | S12              | 151172                              |
|                        | Sheqi, Nanyang      | 112.93            | 33.05            | 112             | Cultivated | S13              | 151176                              |
|                        | Tongbai, Nanyang    | 113.40            | 32.37            | 132             | Wild       | S14              | 151174                              |
|                        | Tongbai, Nanyang    | 113.40            | 32.37            | 132             | Wild       | S15              | 151179                              |
|                        | Wulong, Nanyang     | 112.45            | 32.84            | 127             | Cultivated | S16              | 151178                              |
|                        | Wulong, Nanyang     | 112.52            | 33.00            | 127             | Cultivated | S17              | 151196                              |
|                        | Hubei               | Badong, Enshi     | 110.20           | 30.84           | 931        | Wild             | S18                                 |
| Badong, Enshi          |                     | 110.34            | 30.94            | 1592            | Wild       | S19              | 151177                              |
| Hong'an, Huanggang     |                     | 114.51            | 31.35            | 48              | Wild       | S20              | 151173                              |
| Hong'an, Huanggang     |                     | 114.61            | 31.27            | 55              | Wild       | S21              | 151151                              |
| Hong'an, Huanggang     |                     | 114.56            | 31.16            | 50              | Wild       | S22              | 151199                              |
| Macheng, Huanggang     |                     | 115.05            | 31.29            | 56              | Wild       | S23              | 151173                              |
| Macheng, Huanggang     |                     | 115.11            | 31.48            | 102             | Wild       | S24              | 151152                              |
| Qichun, Huanggang      |                     | 115.02            | 31.18            | 106             | Wild       | S25              | 151178                              |
| Qichun, Huanggang      |                     | 115.36            | 30.14            | 20              | Cultivated | S26              | 151115                              |
| Qichun, Huanggang      |                     | 115.36            | 30.14            | 16              | Cultivated | S27              | 151153                              |
| Qichun, Huanggang      |                     | 115.36            | 30.14            | 16              | Cultivated | S28              | 151175                              |
| Qichun, Huanggang      |                     | 115.36            | 30.14            | 16              | Cultivated | S29              | 151175                              |
| Qichun, Huanggang      |                     | 115.36            | 30.14            | 16              | Cultivated | S30              | 151175                              |
| Qichun, Huanggang      |                     | 115.44            | 30.23            | 16              | Cultivated | S31              | 151178                              |
| Tuanfeng, Huanggang    |                     | 115.10            | 30.75            | 53              | Wild       | S32              | 151175                              |
| Tuanfeng, Huanggang    |                     | 115.10            | 30.75            | 58              | Wild       | S33              | 151151                              |
| Shuichiya, Shenlongjia |                     | Maojian, Shiyan   | 110.84           | 31.68           | 1526       | Wild             | S34                                 |
|                        | Guangshui, Suizhou  | 110.82            | 32.60            | 22              | Wild       | S35              | 151178                              |
|                        | Guangshui, Suizhou  | 113.83            | 31.62            | 969             | Wild       | S36              | 151178                              |
|                        | Guangshui, Suizhou  | 113.70            | 31.94            | 130             | Wild       | S37              | 151151                              |
|                        | Suixian, Suizhou    | 113.59            | 32.09            | 259             | Wild       | S38              | 151157                              |
|                        | Hongshan, Wuhan     | 114.26            | 30.45            | 20              | Wild       | S39              | 151183                              |

**Table S1 Description of *Artemisia argyi* accessions in this study (continued).**

|           |                     |        |       |      |            |     |        |
|-----------|---------------------|--------|-------|------|------------|-----|--------|
|           | Tongcheng, Xianning | 113.82 | 29.25 | 843  | Wild       | S40 | 151175 |
|           | Dawu, Xiaogan       | 114.39 | 31.65 | 106  | Wild       | S41 | 151175 |
|           | Dawu, Xiaogan       | 114.47 | 31.51 | 343  | Wild       | S42 | 151178 |
|           | Wufeng, Yichang     | 111.06 | 30.14 | 445  | Wild       | S43 | 151195 |
|           | Wufeng, Yichang     | 110.34 | 30.94 | 501  | Wild       | S44 | 151152 |
|           | Baokang, Xiangyang  | 112.36 | 31.78 | 110  | Wild       | S45 | 151133 |
|           | Baokang, Xiangyang  | 112.37 | 31.79 | 220  | Wild       | S46 | 151177 |
|           | Baokang, Xiangyang  | 112.36 | 31.78 | 110  | Wild       | S47 | 151133 |
|           | Baokang, Xiangyang  | 112.61 | 31.16 | 152  | Wild       | S48 | 151173 |
| Hunan     | Hengyang, Hengyang  | 112.38 | 26.98 | 102  | Wild       | S49 | 151178 |
|           | Longhui, Shaoyang   | 111.04 | 27.12 | 373  | Wild       | S50 | 151151 |
| Jilin     | Panshi, Jilin       | 126.07 | 42.95 | 401  | Wild       | S51 | 151178 |
|           | Tonghua, Tonghua    | 125.77 | 41.69 | 676  | Wild       | S52 | 151167 |
|           | Yanji, Yanbian      | 129.52 | 42.91 | 269  | Wild       | S53 | 151178 |
| Jiangsu   | Qixia, Nanjing      | 118.91 | 32.10 | 9    | Cultivated | S54 | 151151 |
|           | Qixia, Nanjing      | 118.91 | 32.10 | 9    | Cultivated | S55 | 151151 |
|           | Hai'an, Nantong     | 120.48 | 32.57 | 4    | Wild       | S56 | 151151 |
|           | Sheyang, Yancheng   | 120.33 | 33.77 | 2    | Wild       | S57 | 151179 |
| Jiangxi   | Jiangzhou, Chaisang | 116.19 | 29.79 | 16   | Wild       | S58 | 151175 |
|           | Chongren, Fuzhou    | 116.08 | 27.76 | 44   | Cultivated | S59 | 151177 |
|           | Chongren, Fuzhou    | 116.08 | 27.76 | 46   | Cultivated | S60 | 151180 |
|           | Quannan, Ganzhou    | 114.54 | 27.75 | 263  | Wild       | S61 | 151178 |
|           | Rentian, Ruijin     | 116.10 | 26.05 | 255  | Wild       | S62 | 151151 |
|           | Poyang, Shangrao    | 116.71 | 29.01 | 154  | Wild       | S63 | 151151 |
|           | Zhangshu, Yichun    | 115.55 | 28.06 | 45   | Wild       | S64 | 151178 |
| Shandong  | Hengtai, Zibo       | 118.06 | 36.82 | 20   | Cultivated | S65 | 151179 |
| Shaanxi   | Yushe, Jinzhong     | 112.98 | 37.08 | 1182 | Wild       | S66 | 151151 |
| Shanxi    | Luonan, Shangluo    | 110.15 | 34.10 | 823  | Wild       | S67 | 151181 |
| Sichuan   | Bazhou, Bazhong     | 106.78 | 31.86 | 587  | Cultivated | S68 | 151133 |
| Zhejiang  | Bingjiang, Hangzhou | 120.16 | 30.18 | 42   | Cultivated | S69 | 151174 |
|           | Yongkang, Jinhua    | 120.00 | 28.93 | 87   | Wild       | S70 | 151178 |
|           | Ninghai, Ningbo     | 121.43 | 29.29 | 730  | Cultivated | S71 | 151178 |
| Chongqing | Nan'an              | 106.67 | 29.50 | 275  | Cultivated | S72 | 151175 |



**Table S2 Molecular markers used for the identification of S01, S03, S05, S07, S08, S18 and S34.**

| Primer name | Primer sequence          |
|-------------|--------------------------|
| SSR-1F      | TTTGACTGCGCTTCCACTATA    |
| SSR-1R      | TGAGAAAGGAGAATAGGAACGA   |
| SSR-2F      | CTTTTCCCATCGACTTTTAA     |
| SSR-2R      | TTTGACGTAGTTTAGCCGATTC   |
| SSR-3F      | AATAGTCATTGGTTCAGTCGGTA  |
| SSR-3R      | GAAAACATAAATTGCATCCCTAAA |
| SSR-4F      | TTTGACTCTGGACCATTTCATTC  |
| SSR-4R      | TGCTGAAATCAAGGGGCTATA    |
| SSR-5F      | AGTACTCAAGCGTTTCGGATT    |
| SSR-5R      | TTCCATAAAGGAGCCGAAT      |
| SSR-6F      | AGTTCCTTTTGGATTTTCCTTCT  |
| SSR-6R      | AGTTACAGTAAGACCCGCAGAA   |

**Table S3 Molecular markers used for the identification of S07, S09, S29 and S71.**

| Primer name | Primer sequence             |
|-------------|-----------------------------|
| Chg-1F      | TCTTACTTGATATTAGAGGTC       |
| Chg-1R      | TGGATATCTTTTCTATACTATGT     |
| Chg-2F      | CGAATAGCGGGACCAAAA          |
| Chg-2R      | TCCTCCGATTCTCAAAGGAG        |
| Chg-3F      | ATAGTACAGTGACCCGTTTCAGG     |
| Chg-3R      | TTCGTGATAACTATAACTAAACTCATT |

**Table S4 Primers used for the verification of IR/SC boundaries in *Artemisia argyi* cp genomes.**

| Primer name | Primer sequence          |
|-------------|--------------------------|
| IRb/SSC-F   | TGCGTAATCTCAGCATTCAAT    |
| IRb/SSC-R   | GAATTCCAAATGGAGTTGGTC    |
| SSC/IRa-F   | TTTTCTGATCCCCGTACATA     |
| SSC/IRa-R   | GCTCTACCGTATCTTTTGTTTCAT |
| IRa/LSC-F   | CTGGGGTTATCCTGCACTT      |
| IRa/LSC-R   | GTTCGATTCGCGTGTTTCT      |
| LSC/IRb-F   | CGACGAGACCTATTATCGCTT    |
| LSC/IRb-R   | GGTAAGCGCCCTGTAGTAAGAG   |

**Table S5 Molecular markers used for the identification of *Asteraceae* species.**

| Primer name | Primer sequence          |
|-------------|--------------------------|
| rrn23-1F    | AACACAGGTCTCCGCAAAGTCGT  |
| rrn23-1R    | TGCACGCCTCCGTTACCTTTTGG  |
| rrn23-2F    | GAAACCGACACAGGTGGGTAGGT  |
| rrn23-2R    | CACTTGGCTACCCAGCGTTTACC  |
| ccsA-1F     | ATGATATTTTCAACTTTAGAGCA  |
| ccsA-1R     | CACAAAGAAGAGCCGCATAGCTC  |
| ccsA-2F     | TTTCTTTCATGGAGTTTCTCC    |
| ccsA-2R     | CAAATTATAAGAAAGCCTAGAG   |
| ndhA-1F     | ATCAATTCTTTTTCTAGATTGGA  |
| ndhA-1R     | CATAACTAATTGATTGAGCAGC   |
| ndhA-2F     | AGAGAATCTTCTTCCATCTAGAG  |
| ndhA-2R     | CAACCCCCAAGTAAAGAACTGT   |
| ndhD-1F     | CATAAAGGAAATAGGGTAATTA   |
| ndhD-1R     | ACCGATACCCAGAACTCCCAT    |
| ndhD-2F     | ACAAATAATCTATGCAGCTTCA   |
| ndhD-2R     | AGTTAATATCATTCCAATTGCCAT |
| ropB-1F     | CTCTAATGACTTCTCTGGGAG    |
| ropB-1R     | ATCTCGTATTGGAAAAGTAGC    |
| ropB-2F     | CTAGTCACTATGGGCGTATTTG   |
| ropB-2R     | TCCCATGGCATATAAGCTACTA   |
| ropC1-F     | TCCCATGGCATATAAGCTACTA   |
| ropC1-R     | CAAAAGATTCATATGAGAAAA    |
| ropC2-1F    | GTGAATATTTGCGACAAGAAAT   |
| ropC2-1R    | ATGTTCTCGCGGAATCTCAGCA   |
| ropC2-2F    | TCAAGGAACTATCCATACGTTGT  |
| ropC2-2R    | TCTATATGCCTATTATGTATCTG  |
| ycf1-F      | ATGATTTTGAAATCTTTTCTACT  |
| ycf1-R      | GGTAAAATGAAATGATTGAATA   |
| ycf2-1F     | TCAATCCAGAGATCATTTTGAT   |
| ycf2-1R     | TCTTCTGCTCAGAAACGAAATG   |
| ycf2-2F     | AGATCGATTCTTTGGGATCCTT   |
| ycf2-2R     | GAAATAGGATGAATTGAGACGGT  |

**Table S6 Information of *Asteraceae* cp genomes obtained from NCBI.**

| No. | Species                              | ID         |
|-----|--------------------------------------|------------|
| 1   | <i>Artemisia argyi</i>               | NC030785.1 |
| 2   | <i>Adenostemma lavenia</i>           | MW583043.1 |
| 3   | <i>Ageratina adenophora</i>          | NC015621.1 |
| 4   | <i>Ainsliaea latifolia</i>           | NC056135.1 |
| 5   | <i>Ambrosia artemisiifolia</i>       | MG019037.1 |
| 6   | <i>Ambrosia trifida</i>              | NC036810.2 |
| 7   | <i>Anaphalis sinica</i>              | NC034648.1 |
| 8   | <i>Arctium lappa</i>                 | MH375874.1 |
| 9   | <i>Artemisia absinthium</i>          | MK188885.1 |
| 10  | <i>Artemisia annua</i>               | MF623173.1 |
| 11  | <i>Artemisia frigida</i>             | NC020607.1 |
| 12  | <i>Artemisia giraldii</i>            | OK128342.1 |
| 13  | <i>Artemisia lactiflora</i>          | MZ151340.1 |
| 14  | <i>Artemisia maritima</i>            | MK532038.1 |
| 15  | <i>Artemisia montana</i>             | NC025910.1 |
| 16  | <i>Artemisia ordosica</i>            | NC046571.1 |
| 17  | <i>Artemisia scoparia</i>            | NC045286.1 |
| 18  | <i>Aster spathulifolius</i>          | NC027434.1 |
| 19  | <i>Atractylodes japonica</i>         | NC056949.1 |
| 20  | <i>Atractylodes koreana</i>          | NC056987.1 |
| 21  | <i>Bidens frondosa</i>               | NC050965.1 |
| 22  | <i>Blumea balsamifera</i>            | BK013127.1 |
| 23  | <i>Blumea oxyodonta</i>              | BK013128.1 |
| 24  | <i>Blumea tenella</i>                | BK013129.1 |
| 25  | <i>Carduus acanthoides</i>           | NC053725.1 |
| 26  | <i>Carduus crispus</i>               | NC053726.1 |
| 27  | <i>Carduus tenuiflorus</i>           | NC053727.1 |
| 28  | <i>Carpesium abrotanoides</i>        | MT663326.1 |
| 29  | <i>Carthamus tinctorius</i>          | KX822074.1 |
| 30  | <i>Centaurea diffusa</i>             | NC024286.1 |
| 31  | <i>Centipeda minima</i>              | MZ169540.1 |
| 32  | <i>Chrysanthemum indicum</i>         | MH165290.1 |
| 33  | <i>Chrysanthemum lavandulifolium</i> | NC057202.1 |
| 34  | <i>Chrysanthemum vestitum</i>        | NC057203.1 |
| 35  | <i>Chrysanthemum x morifolium</i>    | NC020092.1 |
| 36  | <i>Codonopsis minima</i>             | NC036311.1 |
| 37  | <i>Dahlia pinnata</i>                | MW589541.1 |
| 38  | <i>Eclipta prostrata</i>             | NC030773.1 |
| 39  | <i>Erigeron canadensis</i>           | MT806101.1 |
| 40  | <i>Gochnatia decora</i>              | NC057205.1 |
| 41  | <i>Gynura cusimbua</i>               | NC056914.1 |

**Table S6 Information of Asteraceae cp genomes obtained from NCBI  
(continued).**

|    |                                   |            |
|----|-----------------------------------|------------|
| 42 | <i>Helianthus annuus</i>          | NC007977.1 |
| 43 | <i>Inula linariifolia</i>         | MN954653.1 |
| 44 | <i>Jacobaea vulgaris</i>          | NC015543.1 |
| 45 | <i>Lactuca sativa</i>             | AP007232.1 |
| 46 | <i>Lactuca tatarica</i>           | NC058613.1 |
| 47 | <i>Ligularia fischeri</i>         | NC039352.1 |
| 48 | <i>Mikania micrantha</i>          | NC031833.1 |
| 49 | <i>Opisthopappus taihangensis</i> | NC042787.1 |
| 50 | <i>Parthenium argentatum</i>      | NC013553.1 |
| 51 | <i>Parthenium hysterophorus</i>   | MT576959.1 |
| 52 | <i>Pericallis hybrida</i>         | NC031898.1 |
| 53 | <i>Pertya multiflora</i>          | NC054328.1 |
| 54 | <i>Petasites japonicus</i>        | NC056924.1 |
| 55 | <i>Platycodon grandiflorus</i>    | MZ202358.1 |
| 56 | <i>Pluchea indica</i>             | NC038194.1 |
| 57 | <i>Rudbeckia laciniata</i>        | MN518844.1 |
| 58 | <i>Silybum marianum</i>           | NC028027.1 |
| 59 | <i>Sinosenecio oldhamianus</i>    | NC057622.1 |
| 60 | <i>Solidago decurrens</i>         | NC053705.1 |
| 61 | <i>Synurus deltoides</i>          | NC046830.1 |
| 62 | <i>Tagetes erecta</i>             | MN203535.1 |
| 63 | <i>Tanacetum cinerariifolium</i>  | NC047309.1 |
| 64 | <i>Taraxacum officinale</i>       | NC030772.1 |
| 65 | <i>Tithonia diversifolia</i>      | MT576958.1 |
| 66 | <i>Tugarinovia mongolica</i>      | NC057258.1 |
| 67 | <i>Tussilago farfara</i>          | MW760850.1 |
| 68 | <i>Waldheimia glabra</i>          | NC058010.1 |
| 69 | <i>Xanthium sibiricum</i>         | MH473582.1 |
| 70 | <i>Xanthopappus subacaulis</i>    | MT643189.1 |
